# Supplementary material for: Evolving social contact patterns during the COVID-19 crisis in Luxembourg
Source: PubMed Central journal article supplement (PMC7410209; doi:10.1371/journal.pone.0237128), 2020-08-06

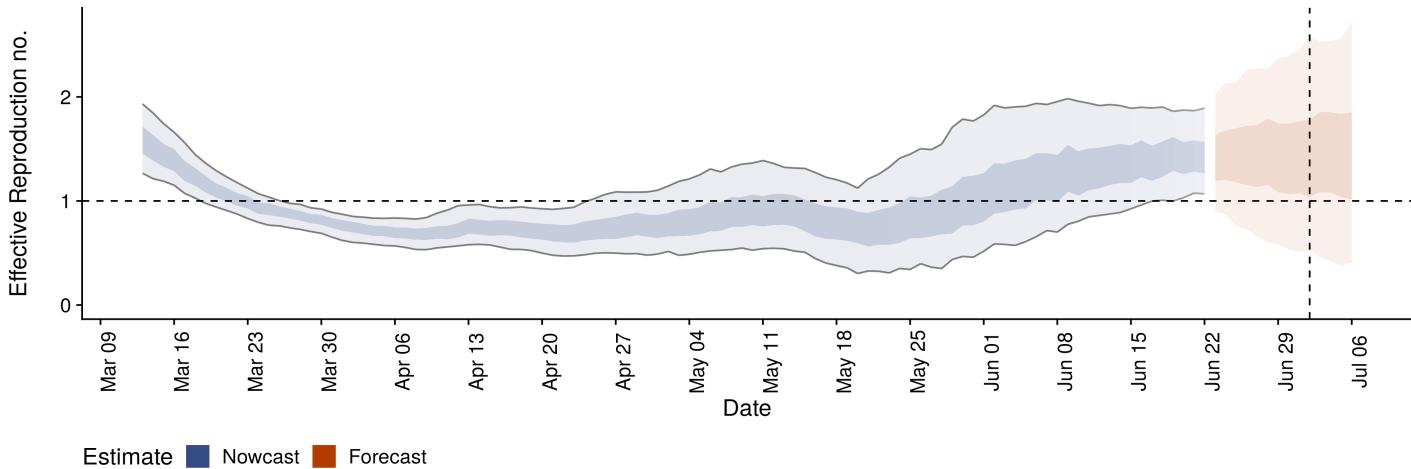

Supplement: pone.0237128.s001.pdf [file pone.0237128.s001.pdf]
